# Supplementary material for: Chronic wasting disease prions in mule deer interdigital glands
Source: PubMed Central journal article supplement (PMC9529147; doi:10.1371/journal.pone.0275375), 2022-10-03

**S1 raw images of Figure 6.**

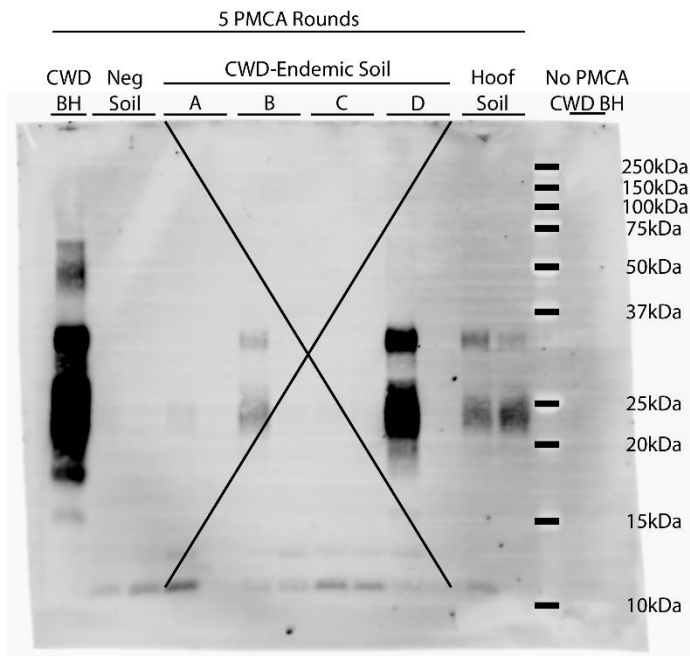

Supplement: pone.0275375.s001.pdf [file pone.0275375.s001.pdf]
